# Supplementary material
Source: Springer Nature journal article supplement (https://www.springermedizin.de/resource/supplementary/12967_2009_346_MOESM2_ESM.pdf/9576268)

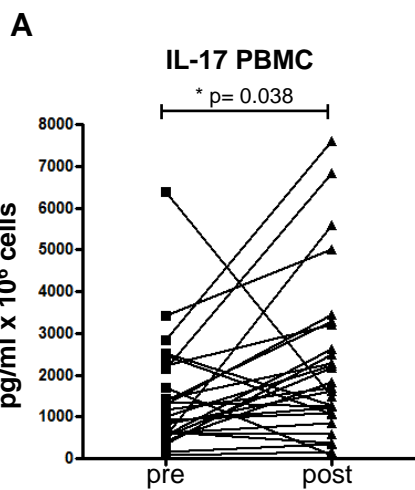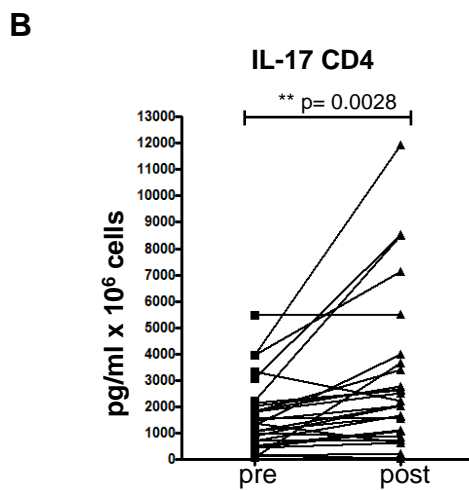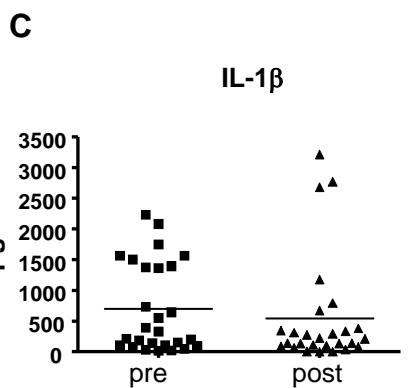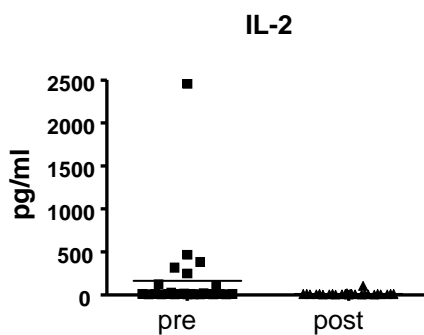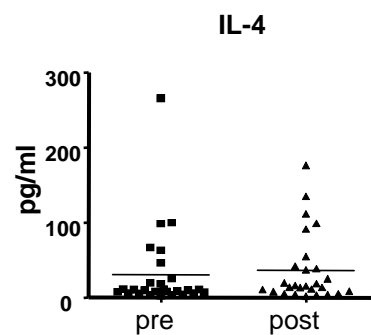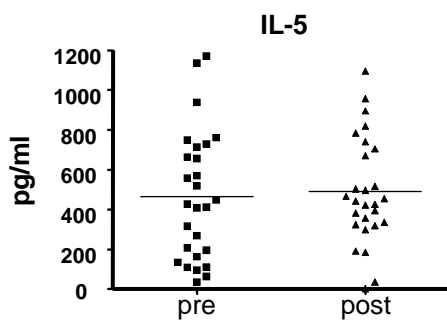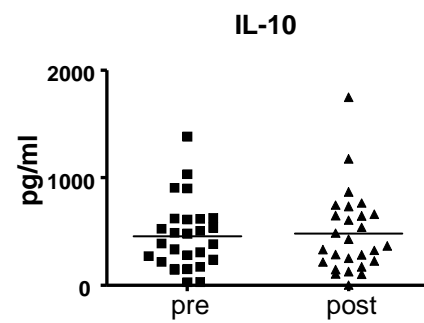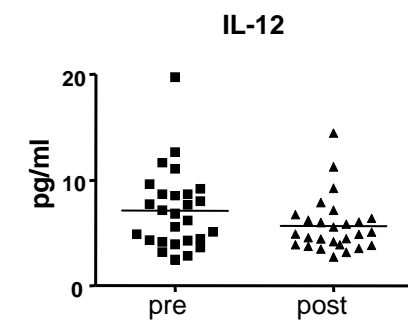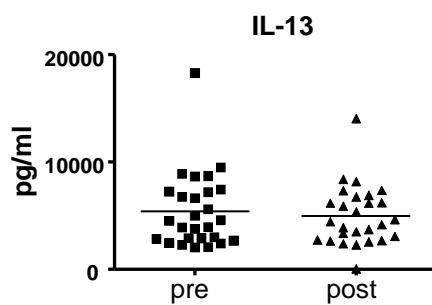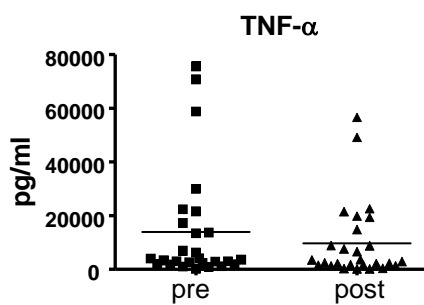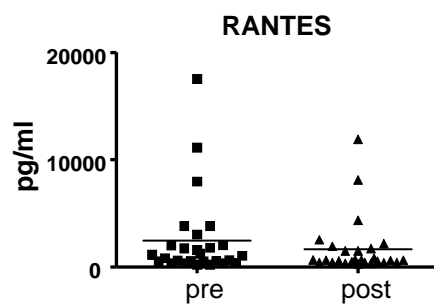

Supplement: MOESM2 [file 9576268]
